# Supplementary material for: Intestinal, extra-intestinal and systemic sequelae of Toxoplasma gondii induced acute ileitis in mice harboring a human gut microbiota
Source: PubMed Central journal article supplement (PMC5393883; doi:10.1371/journal.pone.0176144), 2017-04-17

**A****Naive****d7****SPF**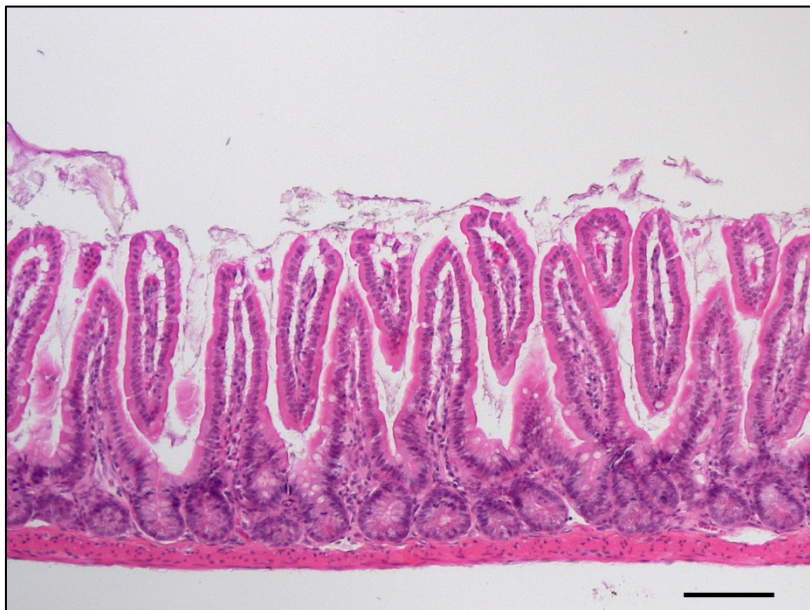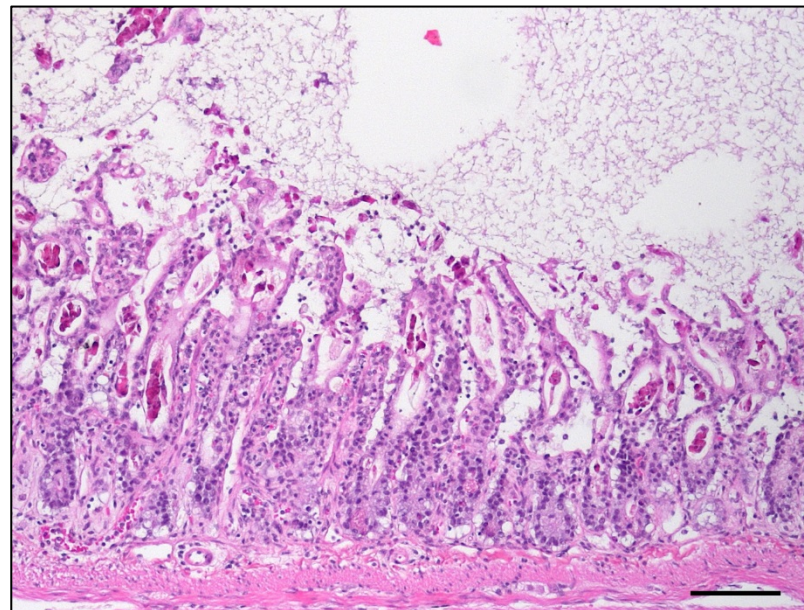**HMA**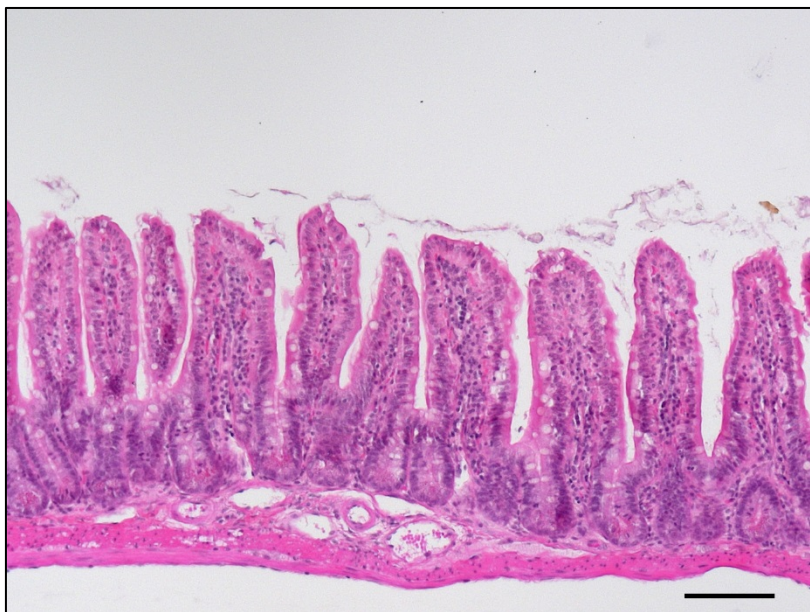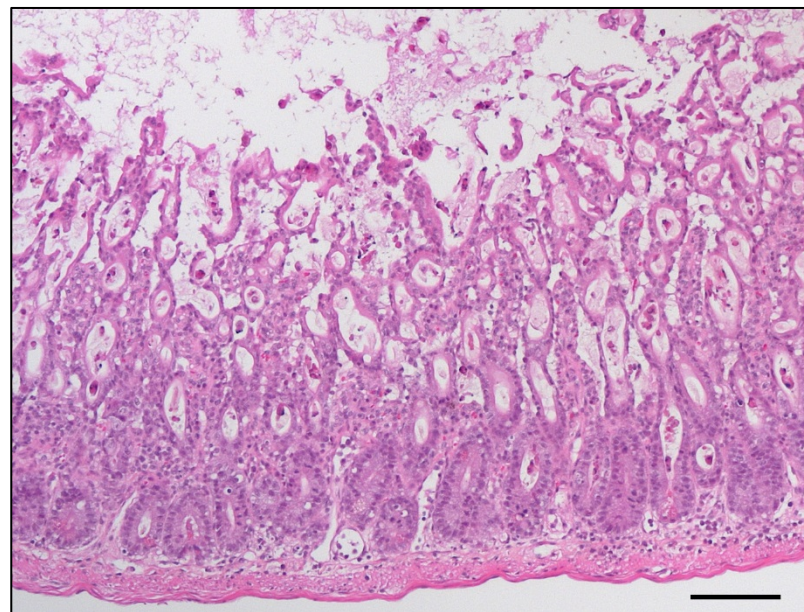

**B**

**Naive**

**d7**

**SPF**

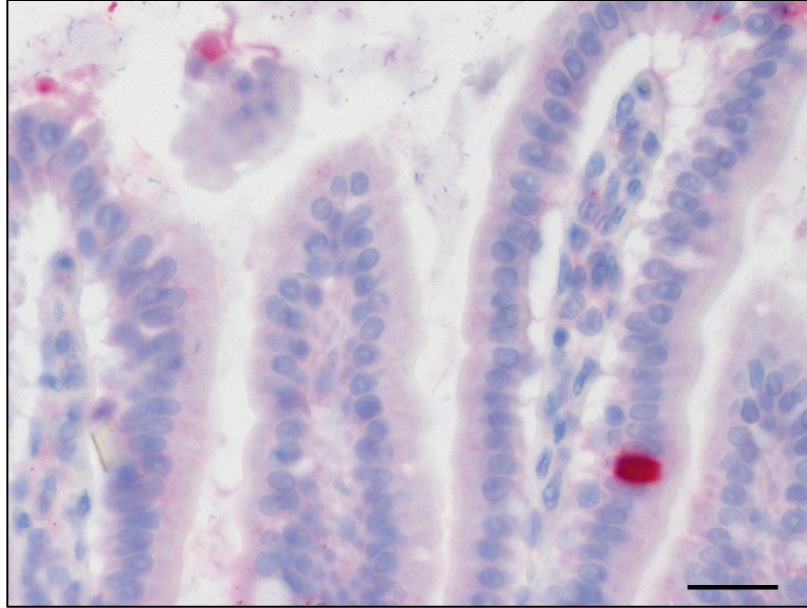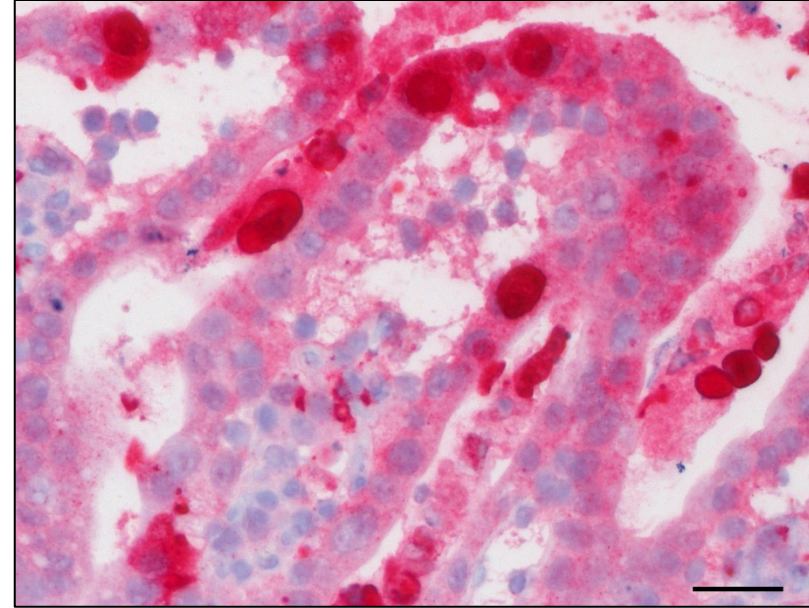

**HMA**

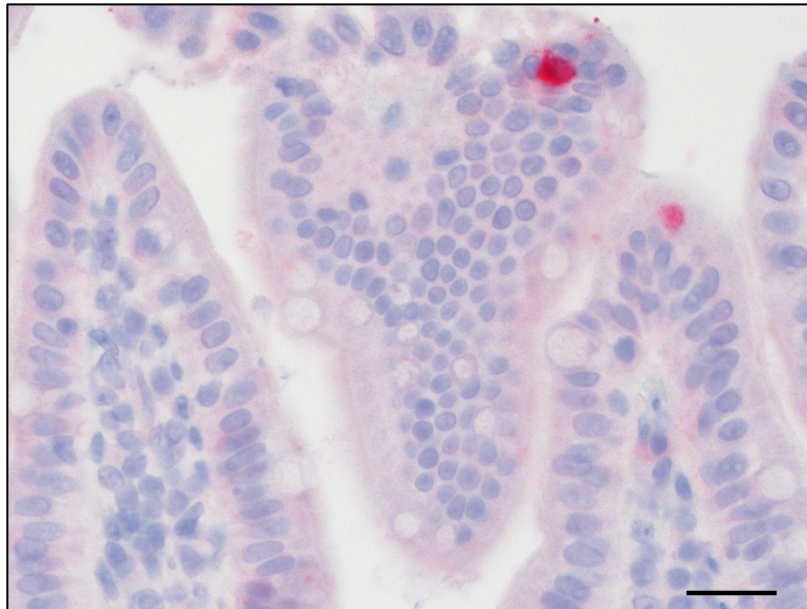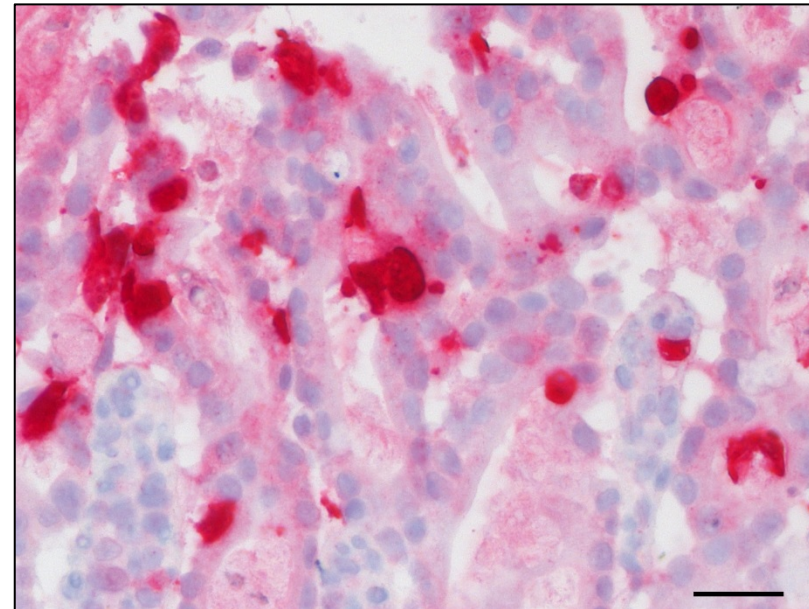

**C**

**Naive**

**d7**

**SPF**

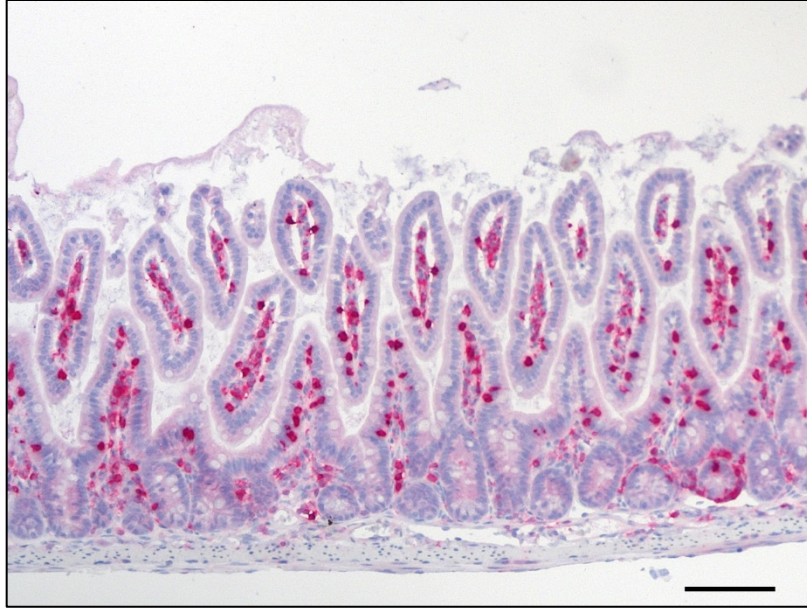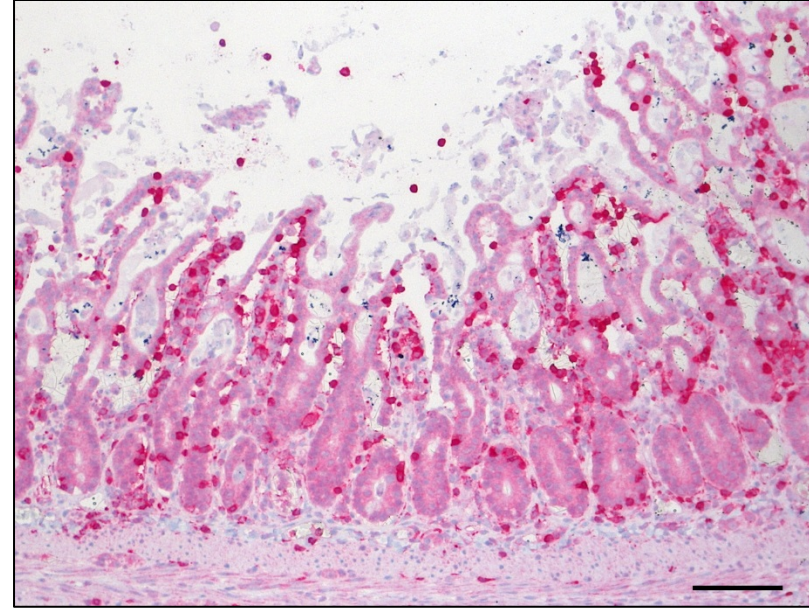

**HMA**

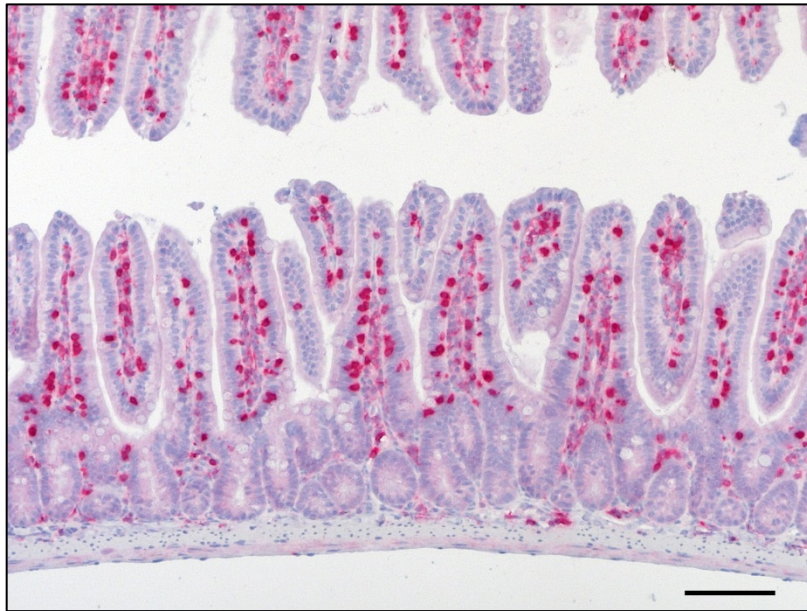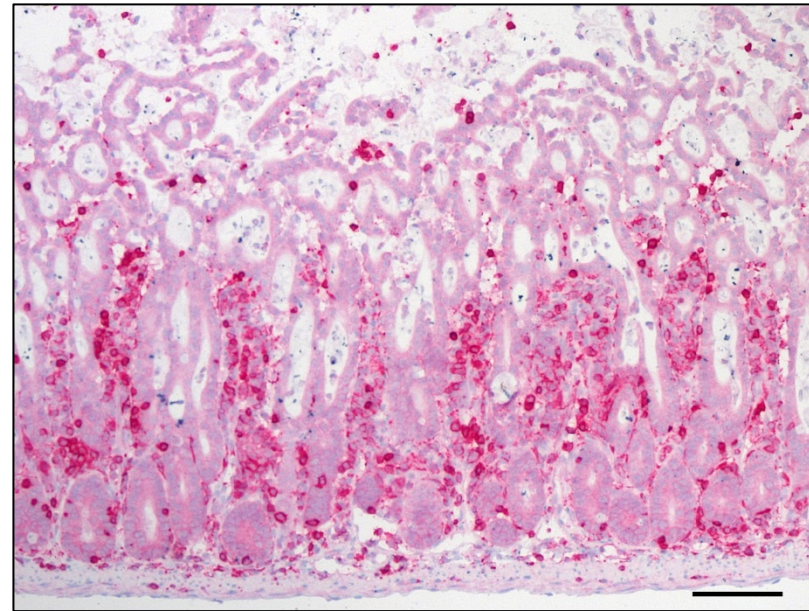

**D**

**Naive**

**d7**

**SPF**

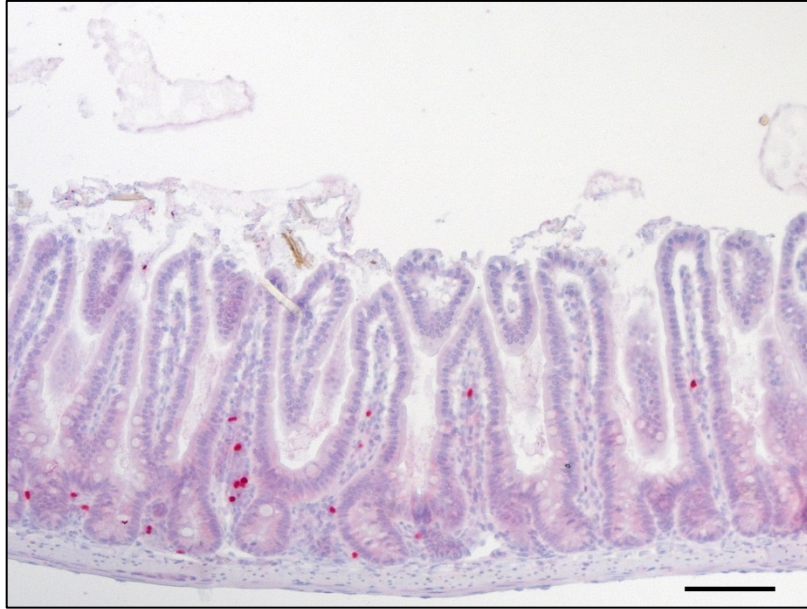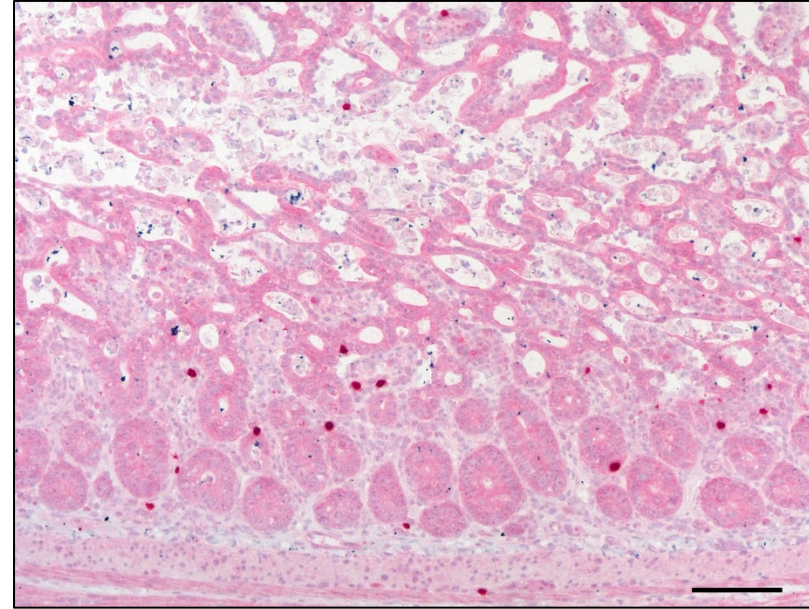

**HMA**

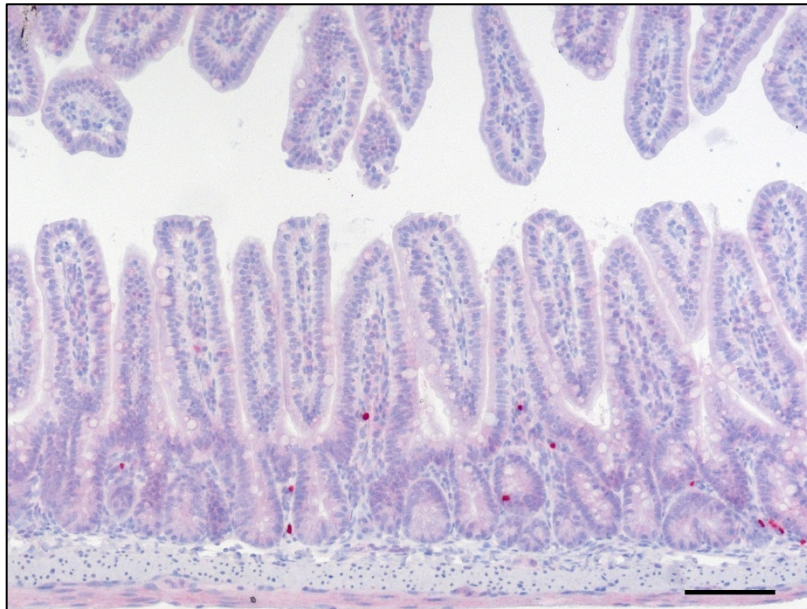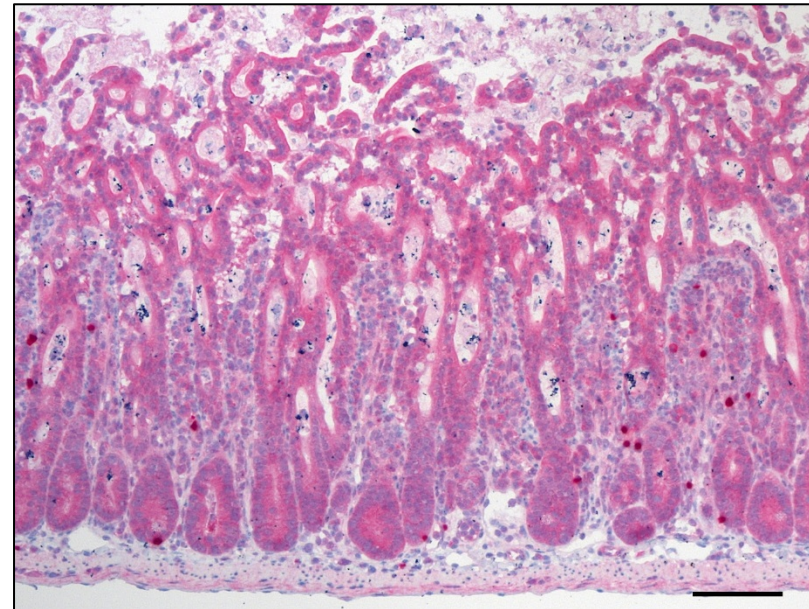

**M**

**Naive**

**d7**

**SPF**

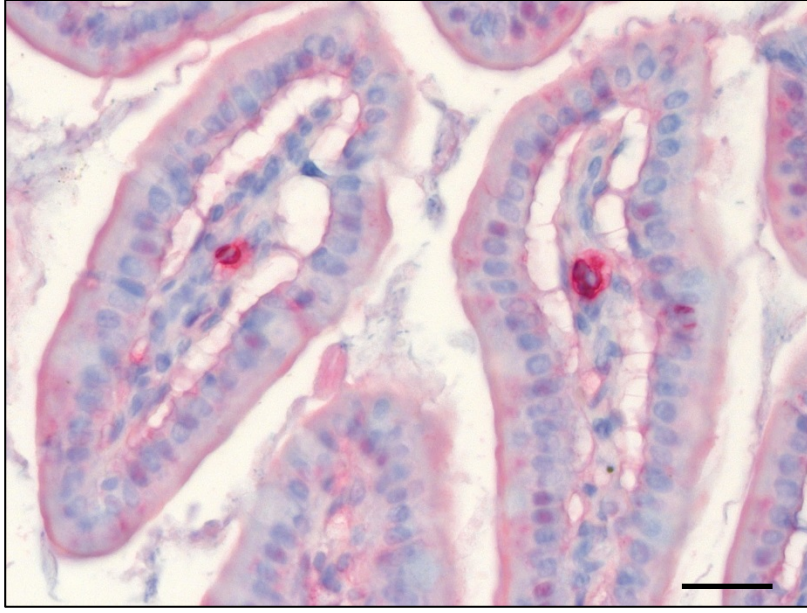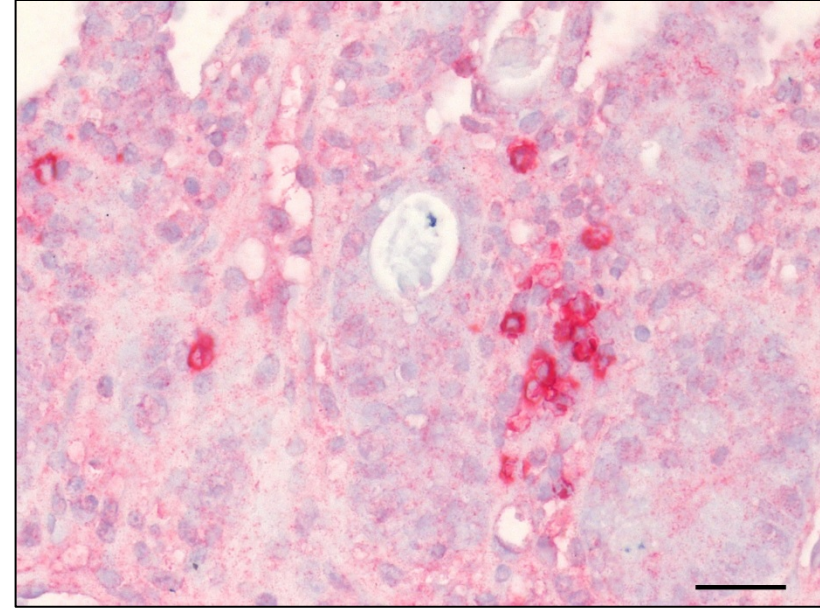

**HMA**

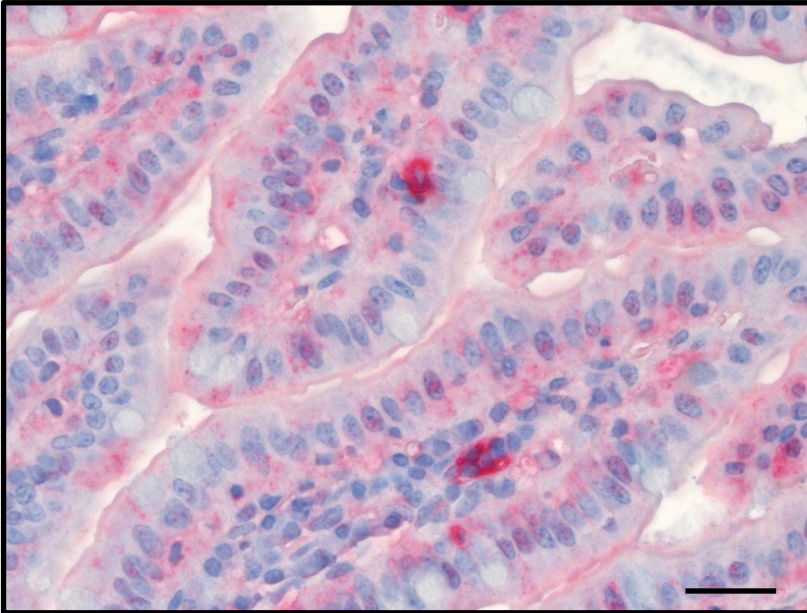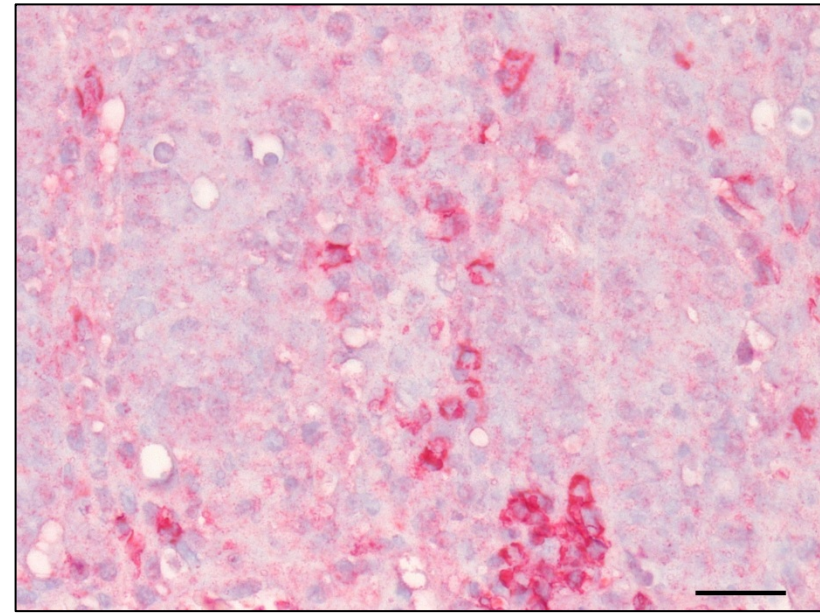

**F**

**Naive**

**d7**

**SPF**

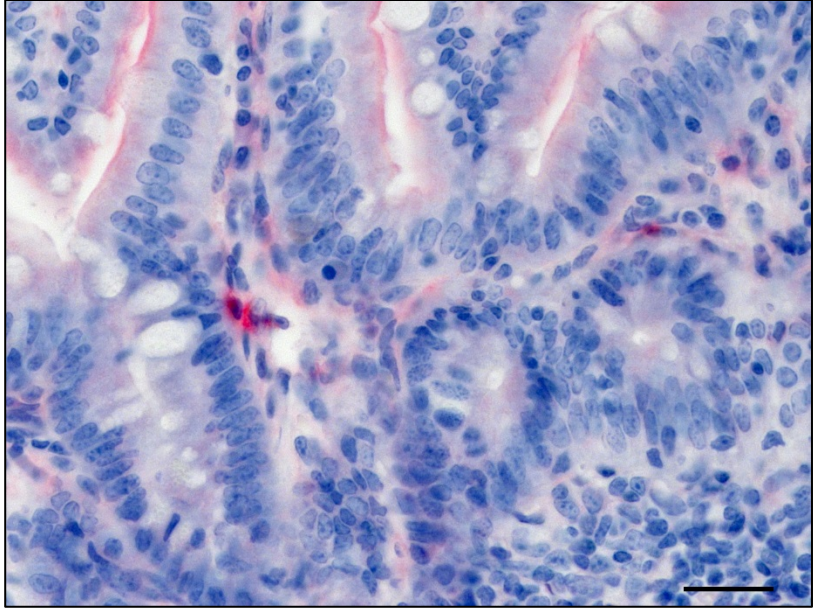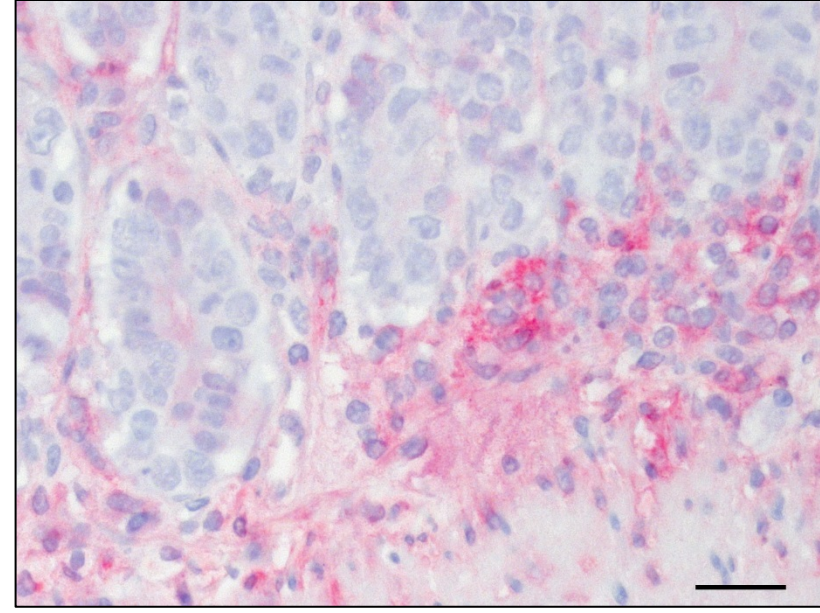

**HMA**

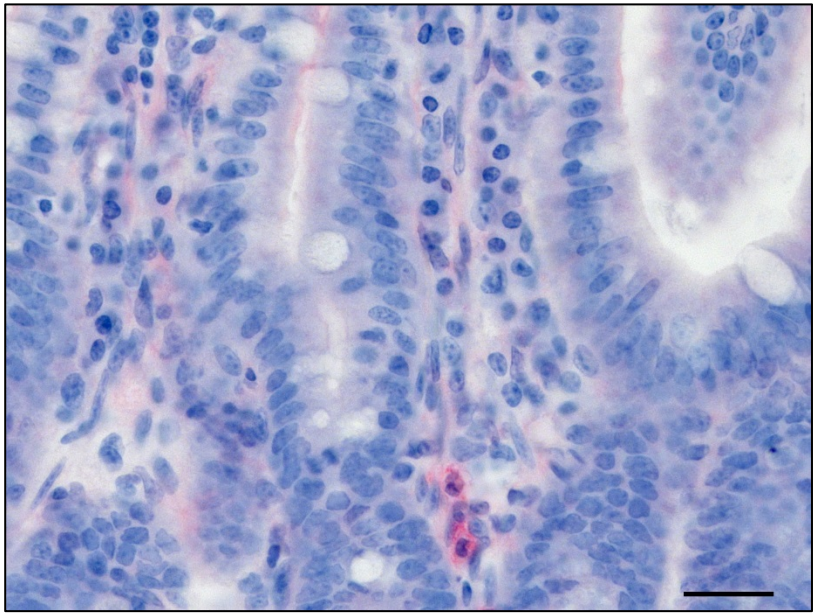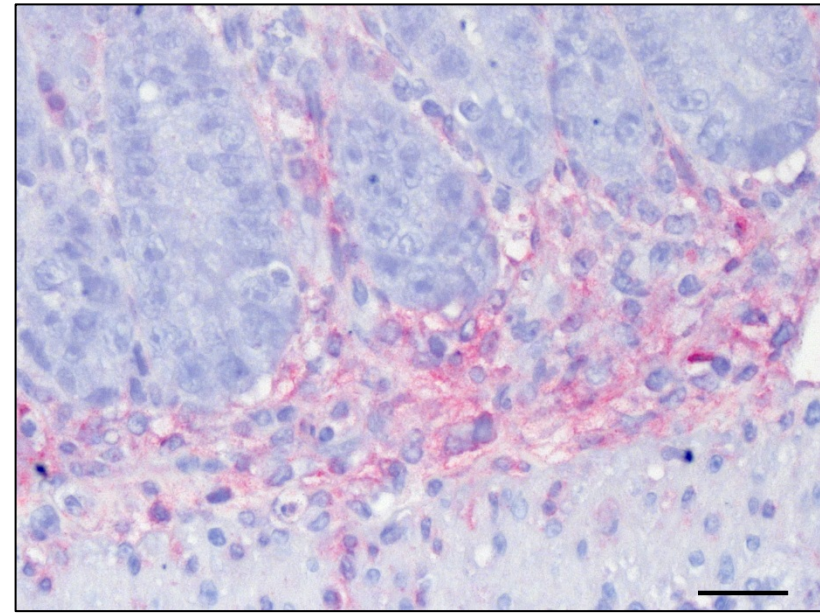

Supplement: pone.0176144.s002.pdf [file pone.0176144.s002.pdf]
